# Supplementary material for: Structural and functional characterization of the intracellular filament-forming nitrite oxidoreductase multiprotein complex
Source: Springer Nature journal article supplement (doi:10.1038/s41564-021-00934-8), 2021-07-15
Supplement: MOESM4 [file 41564_2021_934_MOESM4_ESM.pdf]

*Kuenenia\_stuttgartiensis* α7 α8 β7 α9 β8

*Kuenenia\_stuttgartiensis* 210 MVDRMQGAGTRTFKRRGGMGLLGVITGKY.GMYRFNN.CLAIVDAHNRGVGPDQALIGGRNW  
*Jettenia\_caeni* 210 MVDAMKGAGTRTFKRRGGMGLLGVITGKY.GMYRFNN.SLALVDSHNRGVGPDKALIGGRNW  
*Brocadia\_fulgida* 210 MVDAMKGAGTRTFKRRGGMGLLGVITGKY.GMYRFNN.TLALVDSHNRGVGPDKALIGGRNW  
*Scalindua\_brodae* 212 TLTHWNGAGTRCFKRRGGMGLLGVITGKYMGYRFNS.MLALLDANRVGVGADKAMGRRF  
*Nitrospira\_defluvii* 211 MIEEMMGAGVTRTFKRRGMPILGMMGKH.ANTRFNNCVLPLLDSTWIRKVNPDQAOGGRYW  
*Nitrospira\_nitrificans* 210 MIEEMMGAGVTRCFKRRGMPILGFIGKH.SNTRFNNVPLPLDSTWIRKVNPDQAOGGRYW  
*Nitrospira\_inopinata* 210 MIEEMMGAGTRCFKRRGMPVLGIIGKM.GNTRMNGGINALLDSTWIRKVNPDQAOGGRYW  
*Nitrospina\_gracilis* 209 MIEAMGGSGPRTFKYRGGMGLLGVVVKY.GYRLAN.MVGLLDAIRGRGPGQVLLGGRAW  
*Nitrotoga\_sp.* 214 MIASMHGCGMKTMRFRSGMAALGVLRIRY.SIKRFAQ.GLALLDAYVRNVGPDASGAKVL  
*Hydrogenobaculum\_sp.* 207 MIDTMAGAGTRTLKFRGSMPLAVLRYV.GQYRMSN.MMALLDSTNRKVEPKDALIGGVGW  
*Beggiatoa\_sp.* 175 .....IPAMSQLSFA.AGSRFLG.....LMGGHLL  
*Thiocapsa\_sp.\_KS1* 185 .....IPAMSMVSFL.SGHRLSN.....LLGGTML  
*Nitrolancea\_hollandica\_Ib* 163 .....IPAYSVSFG.AGARFIQ.....LFFGGHL  
*Nitrobacter\_winogradskyi* 175 .....IPAMSMLSFA.AGTRFLLS.....LFFGGGLM  
*Nitrobacter\_hamburgensis* 175 .....IPAMSMLSFA.AGTRFLLS.....LMGGSLI  
*Nitrococcus\_mobilis* 180 .....IPAMSMLSFA.AGTRFLLS.....LFFGGAT  
*Escherichia\_coli* 192 .....IPAMSMVSYA.SGARYLS.....LIGGTCL  
*Aromatoleum\_aromaticum* 192 .....HVHAGSIAW.GAGFRMTY.....LMDGVSP

*Kuenenia\_stuttgartiensis* α10 α11 α12 β9 α13

*Kuenenia\_stuttgartiensis* 268 SNYTWHGDDQAPGHFFSHGLQTSDDVDMNDVRFSKLLVIQTGKKNLIEKMPFAHWLTFEVMERCG  
*Jettenia\_caeni* 268 SNYTWHGDDQAPGHFFSHGLQTSDDVDMNDVRFSKLLVIQTGKKNLIEKMPFAHWLTFEVMERCG  
*Brocadia\_fulgida* 268 SNYTWHGDDQAPGHFFVHGLQTSDDVDMNDIRFVSKLLVIQTGKKNLIEKMPFAHWLTFEVMERCG  
*Scalindua\_brodae* 271 SNYTWHGDDQAPGHFFVHGLQASDDVDFADLRYSKLLVIQVQKKNLIEKMPFAHWLTFEVIERG  
*Nitrospira\_defluvii* 270 NNYTWHGDDQDPSQPFWNGTQNCDDVLDSDMRFTKLNLSWGGKNFVEKMPFAHWLTFESMERG  
*Nitrospira\_nitrificans* 269 NNYTWHGDDQDPSQPFWNGTQNCDDVLDSDMRFTKLNLSWGGKNFVEKMPFAHWLTFESIERG  
*Nitrospira\_inopinata* 269 SNYTWHGDDQNPAPHWWSGVOGSDVLDSDMRFTKLNLSWGGKNFVEKMPFAHWLTFESIERG  
*Nitrospina\_gracilis* 267 SNYTWHGDDQAPGHSWTHGQTSDDVDFADHRYAKLLTIQWQKKNLIEKMPFAHWLTFESMERG  
*Nitrotoga\_sp.* 272 DSYSWHTDLPAGCPEVVTGHQMLDVEFMVYEHAKLLIVFVWGNPFICTKMPDLHWSESRKLG  
*Hydrogenobaculum\_sp.* 265 DNYSEHTDLPAPHTLVTGQQVDFDVLVTWEHAKLLIVLWGMNPGYTKMPSDHWLTFEQAQIKG  
*Beggiatoa\_sp.* 199 SFYDWWYDLPAPAEPEVWGEQTDVHESADWYNKAFIVSMGSLNLMTRTPDVHFAEARHNG  
*Thiocapsa\_sp.\_KS1* 209 SFYDWWYDLPHPVPEVWGDQTDVHESADWYQSAFYIWMGSLNLMTRTADAHFASEHKYNG  
*Nitrolancea\_hollandica\_Ib* 187 SFYDWWYDLPNSPEVWGDQTDVCEESADWYNSKFIIVSNANLNMTRTADAHFVSEARHNG  
*Nitrobacter\_winogradskyi* 199 SFYDWWYDLPSTFPEIWDQTDVCEESADWYNSKFIIVSMASNNMTRTPDVHFISEARTECG  
*Nitrobacter\_hamburgensis* 199 SFYDWWYDLPSTFPEIWDQTDVCEESADWYNSKFIIVSMASNNLNMTRTPDVHFISEARTECG  
*Nitrococcus\_mobilis* 204 SFYDWWYDLPNSPEIWDQTDVCEESADWYNSKFIIVSMASNNLNMTRTPDVHFISEARTECG  
*Escherichia\_coli* 216 SFYDWWYDLPAPSPQTWGEQTDVPEESADWYNSYI IAWGSLNVPQTRTPDAHFFTEVRYK  
*Aromatoleum\_aromaticum* 216 DINVDIGDLYMGAEHTFGKMHMGYSADNLLDAELIFMTCSSNWSYTYPLSSYHFLSEARYK

*Kuenenia\_stuttgartiensis* β10 α14 β11 α15 α16

*Kuenenia\_stuttgartiensis* 328 GKLVVITPEYSPSAQKADYWIPIRNN.TDTALFLGITRILMDKLYDAD.....YVKKF  
*Jettenia\_caeni* 328 GKLVVITPEYSPSAQKADYWIPIRNN.TDTALFLGITRILMDKLYDAD.....YVKKF  
*Brocadia\_fulgida* 328 GKLVVITPEYSPSAQKADYWIPIRNN.TDTALFLGLTKILMDKLYDAD.....YVKKF  
*Scalindua\_brodae* 312 GKLVVITPEYSPSATKADYWIPIRNTGISDITIFLTMTRKIMDNKWDYTD.....YVKKF  
*Nitrospira\_defluvii* 330 ARLVITPEYSPASRADYWIPIRVEP.TDGALFLGASKIILDENQDID.....YVKKF  
*Nitrospira\_nitrificans* 329 ARIAVITPEYSPTAQRADYWIPIRPEQ.SDGALFLGACKIILDENQDID.....YVKKF  
*Nitrospira\_inopinata* 329 ARVVVITPEYSPAYRADYWIPIRPEQ.SDGALFLGAMKIIVDENMHDDV.....YVKKF  
*Nitrospina\_gracilis* 327 GTLVTVCEYSPSTKADYWIPIRCPAGASDISIFLGCARKIIMDEGLVDV.....YVKKF  
*Nitrotoga\_sp.* 332 CHIVDISIDYHAMSNKADVDYIIRPG.TDPALGLGCHILIKNNWYDEN.....YVKKF  
*Hydrogenobaculum\_sp.* 325 IKVIVISNDFMARTADKVVITRTA.TDGALALSMAYVIMKEKLYDEN.....YVKKF  
*Beggiatoa\_sp.* 259 SKFVVFAPDFSQVAKYSDWVWVPEVHAG.QDGAFVVAVNVHVIILTEYVYKKEPSPFNAYMKQF  
*Thiocapsa\_sp.\_KS1* 269 GKLVNLSPDFSDVTKFADLWVPEVPE.TDTAFILSCIHVILQEFHVNRRSEYFHSYVAQY  
*Nitrolancea\_hollandica\_Ib* 247 TKFVVLPADDFSQVAKYSDWVWVPEVHAG.QDGALWMAAGDHWILKEFYIDRQVPYFIDYVKKRY  
*Nitrobacter\_winogradskyi* 259 TKFVVLSPDFSQIAKYCDEWIPVQAG.QDTALWMAANHVILKEYYIDRQVPYFIDYVKKRY  
*Nitrobacter\_hamburgensis* 259 TKFVVLSPDFSQIAKYCDEWIPVQAG.QDTALWMAANHVILKEYYIDRQVPYFIDYVKKRY  
*Nitrococcus\_mobilis* 264 AKFVVLSPDFSQVSKYADWVWVPEVHAG.QDLGIWMAVGHVVIYTEFYVYKQVYFIDYVYTRY  
*Escherichia\_coli* 276 TKTVAVTPDYAEIADLWLPKQV.TDAAMALAMGHVMLREFHLDNPSQYFIDYVYTRY  
*Aromatoleum\_aromaticum* 276 AEVVVVIVAPDFNPTPAADLHVPEVPEV.SDAAFWVGLSQQVMDIEKFLFDRO.....FVCEQ

*Kuenenia\_stuttgartiensis* β12 β13 α17 α18

*Kuenenia\_stuttgartiensis* 381 TDFPLVLRITD.....TLKRLVSPKDIIPNYKLODISDGPYHIQGLK.....  
*Jettenia\_caeni* 381 TDFPLVLRITD.....TLKRLQAKDIPFDYKLEDISHGASYKIHGLH.....  
*Brocadia\_fulgida* 381 TDFPLVLRITD.....TLKRLQAKDVFLNYQLEDISQASFKIHGLH.....  
*Scalindua\_brodae* 385 TDFPLVLRITD.....TLKRLQPEHEIKDYKQPELDY..SHSQGLT.....  
*Nitrospira\_defluvii* 383 TDMPVLRITD.....TLQYLDPEHEVLKDYQVDFTKSYSGRVQGLS.....  
*Nitrospira\_nitrificans* 382 TDMPVLRITD.....TLQYLDPRDVIQDYKFPDFSHSYSGRIQALK.....  
*Nitrospira\_inopinata* 382 TDMPVLRITD.....TLQYLDPRDVIQDYKFPDFSHSYSGRIQALK.....  
*Nitrospina\_gracilis* 381 TDMPVLRITD.....NLIRLHPDDYIPGYKNQPLPKD.GFTTKWMM.....  
*Nitrotoga\_sp.* 385 TDMPVLRITD.....NWKNLKASDIADYKLDLTHHLKVMKKEKPTLPVAFQATA  
*Hydrogenobaculum\_sp.* 378 TDLPVLRITD.....NAKRLLRASDIIPNYIPKALNQAVVYNPSPKQMPPPMKQE.KQ  
*Beggiatoa\_sp.* 318 TDSPFVVLN.QGEEGYEAGRLLRANTII.EAYKDEENGW.....  
*Thiocapsa\_sp.\_KS1* 328 TNLPVLRITD.QEGDHFASGRFLRASDV.AAYADEELADW.....  
*Nitrolancea\_hollandica\_Ib* 306 TDGPVLRITD.QTKGGAYSMPQLLRANRI.NRYKDVENGW.....  
*Nitrobacter\_winogradskyi* 318 TDLPVLRITD.PNGTYKTGRLLRSNRV.ARYKDVENGW.....  
*Nitrobacter\_hamburgensis* 318 TDLPVLRITD.PNGTYKTGRLLRARHV.PRYKDVENGW.....  
*Nitrococcus\_mobilis* 323 TDMPVLRITD.KDGSYRPGRYLSEEV.KKYKQENAAW.....  
*Escherichia\_coli* 335 TDMPVLRITD.ERDGYAAGRMLRAADLVDALGQENPEW.....  
*Aromatoleum\_aromaticum* 329 TDLPVLRITD.....TGKFLSAEDVDG.....GEAK.....

*Kuenenia stuttgartiensis*      β14      β15      α19

```

Kuenenia_stuttgartiensis 422 . . . . . DEQREIIGDFVVDVAKS|KGPKAITRDDVGETLVK . . . . . KGIDPV
Jettenia_caeni 422 . . . . . DDQREIIGDFVVDVAKTKSPKAITRDDVGD|KLVV . . . . . KGIDPA
Brocadia_fulgida 422 . . . . . DDQREIIGDFVVDVAKTKNSPKPITRDDVGD|KLVV . . . . . KGIDPA
Scalindua_brodae 424 . . . . . KDQRGQLGDFVVDVSKTKDFKAITREDVGGK|KMMMA . . . . . KGIDPS
Nitrospira_defluvii 424 . . . . . ODQVQRLGGMVVDVLA|KGAVPLHREQVGVH|LAQ . . . . . SGIDPA
Nitrospira_nitrificans 423 . . . . . PEYIERLGGFMVVDVMAK|KQAVPLHREQVGH|FDK . . . . . SGIEPA
Nitrospira_inopinata 423 . . . . . PEQIQRLGGMVVDVLNK|KQAVPLHREQVGH|VYN . . . . . SGIDAA
Nitrospina_gracilis 421 . . . . . NFNRDKMPDFVVDVNT|DKPVAVTR|EDIGAKMRK . . . . . KNIDPA
Nitrotoga_sp. 437 FVKED . IRKFWGDNVVDVKK|TNKAVPLTR|DECGARYAA . . . . . KGVDSA
Hydrogenobaculum_sp. 429 YIPIQLRDQDINDFVVDVVK|TNSPKVVT|RDVGGK|YFDM . . . . . SSLDPA
Beggiatoa_sp. 356 . . . . . KFLMFDETS|GAPKM . PKGTMG|HRRWQE . KPGQWNLELKDGLDSS|PIEPL
Thiocapsa_sp._KS1 366 . . . . . KLPFCFDK . E|GELRL . PGGT|LGF|RWEEKNTGRWN|LNKNEADVTAQ|FFDPL
Nitrolancea_hollandica_Ib 345 . . . . . QLLVWDKQS . G|PRL . PKGCI|GYRWAKETGKWN|TMEDAMNT|FDLPL
Nitrobacter_winogradskyi 356 . . . . . KMLVLD|TAT|GEPRA . F|KGGV|GDRWGS . THGKWNLSAEDTLDNS|PIDPV
Nitrobacter_hamburgensis 356 . . . . . KMLLLDAN|S|GELRA . P|KQV|GDRWGS . VHGKWNLSGEDTLDNS|PLDPV
Nitrococcus_mobilis 361 . . . . . KQLVLD|RK|NETRC . P|KQV|GHRWAK . QHGQWNLKMEDALDNS|PIEPV
Escherichia_coli 374 . . . . . KTVAFNT . N|GEMVA . P|NGS|IGFRWGE . . KGKWNLEQRD|GKT|GETE|ELO
Aromatoleum_aromaticum 355 . . . . . QFYFFDEK|A|G|SVRKAS|R|G|T|L|K|L|D|F|MP|A|E|L|G|T|F|S|A . . . . .

```

*Kuenenia stuttgartiensis*      β16      β17

```

Kuenenia_stuttgartiensis 462 |E . . . . . G|S|F|K|I|K|T|I|D|E|K|E|T|E|V|V|M|T
Jettenia_caeni 462 |D . . . . . G|T|F|K|V|K|T|V|D|G|K|E|I|E|V|M|P
Brocadia_fulgida 462 |D . . . . . G|T|F|M|V|K|T|V|D|G|K|E|I|E|V|M|P
Scalindua_brodae 464 |E . . . . . G|T|F|Q|V|K|T|V|D|G|K|E|T|E|V|M|T
Nitrospira_defluvii 464 |L . . . . . G|T|Y|R|I|K|L|L|N|G|R|E|V|D|V|M|P
Nitrospira_nitrificans 463 |L . . . . . G|T|Y|R|V|K|L|L|N|G|R|E|I|D|A|L|P
Nitrospira_inopinata 463 |L . . . . . G|T|Y|R|V|K|L|L|N|G|R|E|I|D|A|P
Nitrospina_gracilis 461 |D . . . . . G|V|Y|D|I|K|L|V|S|G|K|I|T|V|M|P
Nitrotoga_sp. 480 |L . . . . . G|D|E|Y|E|V|T|L|V|D|G|K|K|I|K|V|V|P
Hydrogenobaculum_sp. 473 |L . . . . . G|E|Y|E|V|E|L|V|N|G|E|K|V|K|V|K|P
Beggiatoa_sp. 402 |L . . . . . P|V|K|Y|I|E|T|T|D|G|K|I|V|A|V|T|T
Thiocapsa_sp._KS1 412 |L . . . . . S|R|V|L|T|K|K|D|T|K|V|R|V|A|T|
Nitrolancea_hollandica_Ib 391 |L . . . . . V|S|R|R|A|V|P|I|K|Y|L|E|T|S|E|K|I|V|A|V|T|T
Nitrobacter_winogradskyi 402 |L . . . . . V|V|S|R|G|V|P|V|K|R|I|A|T|D|K|G|E|V|L|V|T|T
Nitrobacter_hamburgensis 402 |L . . . . . I|V|S|R|G|V|P|V|R|R|I|A|T|D|K|G|E|I|L|C|A|T|
Nitrococcus_mobilis 407 |L . . . . . L|Y|K|R|G|V|P|A|K|K|I|D|T|G|S|S|V|L|V|A|T|
Escherichia_coli 418 |L . . . . . L|E|N|V|L|L|H|K|L|P|V|R|L|Q|L|A|D|G|S|T|A|L|V|T|T
Aromatoleum_aromaticum 389 |L . . . . . R|L|K|N|E|K|T|I|Q|V|R|T

```

*Kuenenia stuttgartiensis*      α20      α21      α22

```

Kuenenia_stuttgartiensis 481 |L|L|E|M|Y|K|I|H|L . . . . . R . D|Y|D|I|D|S|V|S|V|M|T|N|S|P|K|D|L|E|R|L|A|K|D|I|A|T|I| . . .
Jettenia_caeni 481 |L|F|E|M|Y|K|I|H|L . . . . . K . D|Y|D|I|D|S|V|E|M|T|N|S|P|K|E|L|I|V|R|L|A|H|D|I|A|T|I| . . .
Brocadia_fulgida 481 |L|F|E|M|Y|K|I|H|L . . . . . K . D|Y|D|I|D|S|V|E|M|T|N|S|P|K|E|L|I|E|R|L|A|H|D|I|A|T|I| . . .
Scalindua_brodae 483 |L|F|D|L|Y|K|I|H|L . . . . . R . D|F|D|V|K|T|T|A|D|I|T|G|A|P|A|H|M|I|E|R|L|A|K|D|C|A|T|I| . . .
Nitrospira_defluvii 483 |I|Y|Q|L|Y|T|I|H|L . . . . . Q . D|Y|D|L|D|T|V|H|Q|V|N|R|A|P|K|D|L|I|V|R|W|A|R|D|C|G|T|V| . . .
Nitrospira_nitrificans 482 |I|Y|Q|L|Y|L|I|H|L . . . . . Q . D|Y|D|L|D|T|H|Q|I|T|R|S|P|K|D|L|L|V|R|W|A|R|D|S|G|T|I| . . .
Nitrospira_inopinata 482 |I|W|Q|M|Y|V|M|V|F . . . . . Q . D|Y|D|L|D|T|V|H|Q|I|T|R|T|P|K|D|L|I|V|R|W|A|R|D|S|G|T|I| . . .
Nitrospina_gracilis 480 |L|E|M|Y|K|I|H|L . . . . . K . D|Y|D|L|D|S|V|N|Q|I|S|H|A|P|K|D|L|V|V|R|L|A|R|D|I|G|T|I| . . .
Nitrotoga_sp. 499 |V|F|Q|L|Q|E|Y|L . . . . . E . E|F|T|A|E|N|T|S|I|M|T|G|V|P|V|E|A|I|N|D|L|A|L|F|H|K|H| . . .
Hydrogenobaculum_sp. 492 |N|F|Q|A|Y|I|E|L|L . . . . . E . E|N|Y|T|P|E|T|V|E|E|I|T|G|V|P|A|N|V|I|E|R|L|A|E|I|A|N|H| . . .
Beggiatoa_sp. 447 |I|F|D|M|L|M|A|H|F|G|V|D|R . E|L|G|G|E|Y|P|S|S|Y|D|D|S|D|Q|I|F|T|P|A|W|Q|E|K|F|T|G|I|D|K|S|T|V|I|N|F|A|N|Q|E|F|A|T|T|A|E|K
Thiocapsa_sp._KS1 472 |A|Y|D|L|L|A|S|F|G|V|N|R|G|L|S|G|S|G|Y|P|K|D|Y|D|D|A|S|E|A|Y|T|P|A|W|Q|E|Q|E|T|G|V|D|R|N|L|A|I|V|A|E|F|A|D|T|A|E|K
Nitrolancea_hollandica_Ib 435 |A|F|D|L|L|A|Q|F|A|V|G|R|P|G|L|T|G|D|Y|P|K|S|Y|D|D| . M|P|Y|T|P|A|W|Q|E|G|Y|T|G|I|G|R|D|T|V|I|F|A|E|F|A|G|N|A|E|A
Nitrobacter_winogradskyi 446 |G|F|D|I|M|S|Q|F|G|H|S|R . G|L|E|G|S|F|A|T|S|Y|D|D|E|D|A|P|Y|T|P|A|W|Q|E|R|H|T|G|I|G|R|E|T|A|I|F|A|E|F|A|T|N|A|E|L
Nitrobacter_hamburgensis 446 |G|F|D|I|M|S|Q|F|G|I|S|R . G|L|E|G|F|A|T|S|Y|D|D|E|D|A|P|Y|T|P|A|W|Q|E|R|H|T|G|I|G|R|E|T|A|I|F|A|E|F|A|T|T|A|E|Y
Nitrococcus_mobilis 451 |V|Y|D|L|N|M|G|Q|Y|A|V|R . G|L|P|G|D|Y|P|E|S|Y|D|D|L . K|P|Y|T|P|A|W|Q|E|Q|Y|T|G|I|G|R|D|T|V|I|F|A|E|F|A|G|T|A|E|K
Escherichia_coli 474 |V|Y|D|L|T|L|A|N|Y|G|L|R|G|L|N|D|V|N|C|A|T|S|Y|D|D|V . K|A|Y|T|P|A|W|A|E|Q|I|T|G|V|S|S|Q|I|I|T|I|A|E|F|A|D|N|A|D|K
Aromatoleum_aromaticum 401 |V|F|E|G|L|R|E|H . . . . . L|K|D|Y|T|P|E|K|A|S|A|K|G|V|P|V|S|I|L|E|R|L|G|R|K|V|A| . . . . .

```

*Kuenenia stuttgartiensis*      β18      α23      β19

```

Kuenenia_stuttgartiensis 519 |K|P| . V|A|I|H|Y|G|E|G|V|N|H|Y|F|H|A|T| . |L|M|N|R|S|Y|L|P|V|M|L|T|G|N|V|Y|F|G|S| . G|S|H|T|W|A|G|N|Y|K|A|G|N|F|Q|A|S
Jettenia_caeni 519 |K|P| . V|A|I|H|Y|G|E|G|I|N|H|W|F|H|A|T| . |L|M|N|R|S|T|Y|L|P|L|M|L|T|G|N|I|C|Y|P|G|S| . G|S|H|T|W|A|G|N|Y|K|A|G|N|F|Q|A|S
Brocadia_fulgida 519 |K|P| . V|A|I|H|Y|G|E|G|I|N|H|W|F|H|A|T| . |L|F|N|R|S|T|Y|L|P|L|M|L|T|G|N|V|Y|K|G|S| . G|S|H|T|W|S|G|N|Y|K|A|G|N|F|Q|A|S
Scalindua_brodae 521 |K|P| . V|A|I|H|Y|G|E|G|I|N|H|Y|F|H|A|T| . |L|H|N|R|A|T|Y|L|P|L|M|L|T|G|N|I|C|Y|H|G|S| . G|S|H|T|W|A|G|N|Y|K|A|G|N|F|Q|G|S
Nitrospira_defluvii 521 |K|P| . A|A|I|H|N|G|E|G|V|C|H|Y|F|H|T| . |S|M|G|R|A|A|L|V|M|M|L|T|G|N|I|C|K|F|G|T| . G|C|H|T|W|S|G|N|Y|K|V|G|I|W|Q|A|A
Nitrospira_nitrificans 520 |K|P| . A|A|I|H|N|G|E|G|V|C|H|Y|F|H|T| . |A|N|G|R|A|A|L|V|L|T|L|T|G|N|I|C|K|F|G|S| . G|C|H|T|W|S|G|N|Y|K|V|G|I|W|N|N|A|T
Nitrospira_inopinata 520 |K|P| . A|A|I|H|N|G|E|G|T|C|H|Y|F|H|Q|T| . |I|N|A|R|G|A|A|M|V|L|I|I|T|G|N|V|C|K|F|G|T| . G|O|H|T|W|A|G|N|Y|K|A|G|A|W|T|A|P
Nitrospina_gracilis 518 |K|P| . V|E|I|H|Y|G|E|G|I|N|H|Y|F|H|A|T| . |M|H|N|R|A|S|Y|V|P|L|M|L|T|G|N|V|C|P|K|G|S| . G|S|H|T|W|A|G|N|Y|K|A|G|N|Y|Q|G|S
Nitrotoga_sp. 537 |R|G|Q|G|I|S|T|G|A|G|T|N|H|Y|F|N|S|T| . |L|K|D|R|G|F|M|L|L|S|A|L|S|D|N|V|G|H|I|G|C| . A|F|G|N|Y|V|G|N|Y|R|Q|S|V|F|G| . .
Hydrogenobaculum_sp. 531 |K|G|T|K|I|T|T|G|M|G|V|N|Q|Y|F|H|G|D| . |L|I|V|R|A|I|F|L|V|A|A|L|T|G|N|V|G|R|E|S|G| . N|I|G|S|Y|A|G|N|Y|R|L|A|V|F|N| . .
Beggiatoa_sp. 506 |T|G|G|K|C|T|V|I|G|A|G|I|N|H|W|Y|H|N|N| . |L|M|Y|R|G|P|I|T|A|L|M|L|C|G|C|V|K|N|G|G| . G|L|A|H|Y|V|G|Q|E|K|L|A|P|I|S|I|W
Thiocapsa_sp._KS1 532 |T|K|G|K|C|L|F|I|T|G|S|G|I|L|H|W|Y|H|G|G|S|L|T|Y|R|S|E|A|V|M|G|I|L|T|G|C|C|G|R|N|G|G| . G|F|A|H|Y|V|G|E|K|I|R|N|M|A|A|I
Nitrolancea_hollandica_Ib 494 |T|Q|G|R|S|M|V|I|T|G|A|S|L|N|H|W|Y|N|N|G| . |L|C|Y|R|G|P|I|T|A|L|I|L|C|G|C|C|G|R|N|G|G| . G|L|N|H|Y|V|G|Q|E|K|L|S|L|V|S|A|W
Nitrobacter_winogradskyi 505 |T|N|G|K|S|M|V|I|V|G|A|S|A|N|H|W|Y|N|N| . |L|C|Y|R|S|A|T|V|A|L|I|L|C|G|C|C|G|V|N|G|G| . G|I|N|H|Y|V|G|Q|E|K|L|A|P|V|A|P
Nitrobacter_hamburgensis 505 |T|N|G|K|S|M|V|I|V|G|A|S|A|N|H|W|Y|N|N| . |L|C|Y|R|S|A|T|V|A|L|I|L|C|G|C|C|G|V|N|G|G| . G|I|N|H|Y|V|G|Q|E|K|L|A|P|V|A|P
Nitrococcus_mobilis 509 |T|K|G|R|S|M|V|I|V|G|A|S|A|N|H|W|Y|H|N|N| . |F|I|Y|R|A|A|I|N|C|L|I|L|C|G|C|C|G|R|N|G|G| . G|M|N|H|Y|V|G|Q|E|K|L|A|I|L|A|P|W
Escherichia_coli 533 |T|H|G|R|S|M|I|V|G|A|G|L|N|H|W|Y|H|L|D| . |M|N|Y|R|G|L|I|N|M|L|I|F|C|G|C|G|Q|S|G|G| . G|W|A|H|Y|V|G|Q|E|K|L|R|P|Q|T|G|W
Aromatoleum_aromaticum 437 |K|K|R|T|C|S|Y|I|G|F|S|S|A|K|S|Y|H|G|D| . |L|M|R|E|S|L|F|L|A|M|A|L|S|G|N|W|C|K|P|G|T| . G|A|F|A|W|A|Y|S|D|D|N|M|V|Y|L|G|V

```

*Kuenenia stuttgartiensis*

Table with 2 columns: Species name and sequence alignment. Species include Kuenenia stuttgartiensis, Jettenia caeni, Brocadia fulgida, Scalindua brodae, Nitrospira defluvii, Nitrospira nitrificans, Nitrospira inopinata, Nitrospina gracilis, Nitrotoga sp., Hydrogenobaculum sp., Beggiatoa sp., Thiocapsa sp. KS1, Nitrolancea hollandica Ib, Nitrobacter winogradskyi, Nitrobacter hamburgensis, Nitrococcus mobilis, Escherichia coli, and Aromatoleum aromaticum. Sequence alignment shows conserved regions with asterisks indicating identity.

*Kuenenia stuttgartiensis*

Table with 2 columns: Species name and sequence alignment. Species include Kuenenia stuttgartiensis, Jettenia caeni, Brocadia fulgida, Scalindua brodae, Nitrospira defluvii, Nitrospira nitrificans, Nitrospira inopinata, Nitrospina gracilis, Nitrotoga sp., Hydrogenobaculum sp., Beggiatoa sp., Thiocapsa sp. KS1, Nitrolancea hollandica Ib, Nitrobacter winogradskyi, Nitrobacter hamburgensis, Nitrococcus mobilis, Escherichia coli, and Aromatoleum aromaticum. Sequence alignment shows conserved regions with asterisks indicating identity.

*Kuenenia stuttgartiensis*

Table with 2 columns: Species name and sequence alignment. Species include Kuenenia stuttgartiensis, Jettenia caeni, Brocadia fulgida, Scalindua brodae, Nitrospira defluvii, Nitrospira nitrificans, Nitrospira inopinata, Nitrospina gracilis, Nitrotoga sp., Hydrogenobaculum sp., Beggiatoa sp., Thiocapsa sp. KS1, Nitrolancea hollandica Ib, Nitrobacter winogradskyi, Nitrobacter hamburgensis, Nitrococcus mobilis, Escherichia coli, and Aromatoleum aromaticum. Sequence alignment shows conserved regions with asterisks indicating identity. Above the alignment, domain labels alpha24, beta20, beta21, and beta22 are shown with arrows indicating their positions.

*Kuenenia stuttgartiensis*

Table with 2 columns: Species name and sequence alignment. Species include Kuenenia stuttgartiensis, Jettenia caeni, Brocadia fulgida, Scalindua brodae, Nitrospira defluvii, Nitrospira nitrificans, Nitrospira inopinata, Nitrospina gracilis, Nitrotoga sp., Hydrogenobaculum sp., Beggiatoa sp., Thiocapsa sp. KS1, Nitrolancea hollandica Ib, Nitrobacter winogradskyi, Nitrobacter hamburgensis, Nitrococcus mobilis, Escherichia coli, and Aromatoleum aromaticum. Sequence alignment shows conserved regions with asterisks indicating identity. Above the alignment, domain labels alpha25 and beta23 are shown with arrows indicating their positions.

|                                  |     |           |        |          |          |          |        |       |        |       |                     |        |             |        |      |      |
|----------------------------------|-----|-----------|--------|----------|----------|----------|--------|-------|--------|-------|---------------------|--------|-------------|--------|------|------|
|                                  |     | β24 →     | β25 →  | β26 →    | α26      |          |        |       |        |       |                     |        |             |        |      |      |
| <i>Kuenenia stuttgartiensis</i>  | 690 | YADFAFPAN | SWVFE  | QFEFETNS | CS.NSNPF | IQIWGKTG | TTFVVE | SKD   | DVVK   | TLAGM | ASKLGEL             |        |             |        |      |      |
| <i>Jettenia caeni</i>            | 690 | YADFAFPAN | SWAFEF | THEEITTS | CS.SSNPF | IQIWK    | .GGIK  | PVNSD | KDDV   | MILAG | MAAKLGEL            |        |             |        |      |      |
| <i>Brocadia fulgida</i>          | 690 | YADFAFPAN | SWVFE  | THEEITTS | CS.SSNPF | VQIWK    | .GGIR  | PVNDT | KDDV   | MILAG | MATKLGEL            |        |             |        |      |      |
| <i>Scalindua brodae</i>          | 692 | YADVGF    | PNNSW  | VEFEHYE  | VTCSC    | .SNPFL   | QVWK   | .GGIK | PLHDT  | KDDV  | VPALVSKRMGEL        |        |             |        |      |      |
| <i>Nitrospira defluvii</i>       | 692 | HADVAF    | AVNSW  | MVEFTYPE | EMTAV    | .SNPWW   | QIWK   | .GGIR | PLDYTR | NDLD  | SFAGVAAKLKEM        |        |             |        |      |      |
| <i>Nitrospira nitrificans</i>    | 691 | HADIAF    | AVNSW  | MVEFTYPE | EMTAV    | .SNPWW   | QIWK   | .GGIR | PLDYTR | NDAD  | TFAGVAAKLAEI        |        |             |        |      |      |
| <i>Nitrospira inopinata</i>      | 691 | HADIAF    | AVNSW  | MVEFTYPE | EMTAV    | .SNPWW   | QIWK   | .GGIR | PLDYTR | NDLD  | TFAGVAAKLSDM        |        |             |        |      |      |
| <i>Nitrospina gracilis</i>       | 689 | YADFLA    | AANSW  | AFESYE   | EITNS    | CS.SNP   | FHQI   | WGGTG | IKP    | VFDT  | IDNLIHREFAKRLSQV    |        |             |        |      |      |
| <i>Nitrotoga sp.</i>             | 697 | YSDIVW    | GVDSW  | LKWKHT   | DMAC     | SC.SNP   | FLTV   | SPITP | LR     | RFD   | TVGDVEVPAGLFRRAFTAM |        |             |        |      |      |
| <i>Hydrogenobaculum sp.</i>      | 689 | YSDIIL    | GVDAW  | ENR      | FDIS     | GC.TN    | PF     | LVW   | PR     | TQ    | KRLFD               | TNDIET | YALVAKRLSEL |        |      |      |
| <i>Beggiatoa sp.</i>             | 756 | YSDIVL    | EPTAH  | WYE      | ..       | KND      | INTD   | .MHSF | IHPLS  | .EAV  | APN                 | WEART  | DWNIIYKSI   | AKGVS  |      |      |
| <i>Thiocapsa sp. KS1</i>         | 786 | YSDIVL    | EPTAH  | WYE      | ..       | KFD      | LTC    | TD    | .LHS   | F     | LHP                 | FT     | PA          | HDPAYE | SKH  |      |
| <i>Nitrolancea hollandica Ib</i> | 743 | YSDIVL    | EPTAH  | WYE      | ..       | KND      | LNTD   | .LHT  | F      | IHPLG | .AAV                | P      | P           | W      | EAKS |      |
| <i>Nitrobacter winogradskyi</i>  | 754 | YSDIIL    | EPTAF  | WYE      | ..       | KND      | LNTD   | .LHS  | F      | L     | H                   | V      | L           | G      | .QAV | P    |
| <i>Nitrobacter hamburgensis</i>  | 754 | YSDIIL    | EPTAF  | WYE      | ..       | KND      | LNTD   | .LHS  | F      | L     | H                   | V      | L           | G      | .QAV | P    |
| <i>Nitrococcus mobilis</i>       | 759 | YSDIIL    | EPTAF  | WYE      | ..       | KND      | LNTD   | .LHS  | F      | I     | H                   | P      | L           | S      | .QAV | P    |
| <i>Escherichia coli</i>          | 782 | YSDIIL    | EPTAT  | WYE      | ..       | KDD      | MNT    | SD    | .MHP   | F     | I                   | H      | P           | L      | S    | .AAV |
| <i>Aromatoleum aromaticum</i>    | 645 | YADIVL    | EPCAW  | YVE      | ..       | KHE      | M      | T     | TE     | C     | S                   | G      | N           | P      | F    | TF   |

|                                  |     |        |     |    |     |         |       |         |         |     |   |
|----------------------------------|-----|--------|-----|----|-----|---------|-------|---------|---------|-----|---|
| <i>Kuenenia stuttgartiensis</i>  | 749 | LRDKRF | EDN | NW | KFA | I.....  | EGRA  | S       | V       | Y   | T |
| <i>Jettenia caeni</i>            | 748 | LRDMRF | DV  | W  | KFA | AL..... | EGR   | P       | E       | V   | Y |
| <i>Brocadia fulgida</i>          | 748 | LRDMRF | R   | D  | Y   | W       | KFA   | AL..... | EGR     | P   | E |
| <i>Scalindua brodae</i>          | 750 | LGDRR  | F   | A  | D   | Y       | W     | KFA     | AL..... | EDR | P |
| <i>Nitrospira defluvii</i>       | 750 | TGEQR  | M   | A  | D   | Y       | Y     | K       | F       | A   | I |
| <i>Nitrospira nitrificans</i>    | 749 | TGEKR  | M   | R  | D   | V       | F     | H       | F       | V   | Y |
| <i>Nitrospira inopinata</i>      | 749 | TGDKR  | M   | K  | D   | Y       | F     | A       | M       | V   | Y |
| <i>Nitrospina gracilis</i>       | 748 | TGDKR  | F   | A  | D   | Y       | V     | K       | V       | Y   | E |
| <i>Nitrotoga sp.</i>             | 756 | TGQ    | R   | F  | A   | D       | F     | F       | K       | F   | V |
| <i>Hydrogenobaculum sp.</i>      | 748 | TGDKR  | F   | K  | E   | Y       | W     | H       | F       | V   | Y |
| <i>Beggiatoa sp.</i>             | 812 | AEKHL  | P   | E  | P   | V       | K     | D       | F       | V   | C |
| <i>Thiocapsa sp. KS1</i>         | 842 | AKVH   | L   | P  | D   | P       | I     | E       | D       | L   | M |
| <i>Nitrolancea hollandica Ib</i> | 799 | APSV   | F   | P  | Q   | P       | V     | K       | D       | I   | V |
| <i>Nitrobacter winogradskyi</i>  | 810 | SPLA   | F   | S  | K   | P       | V     | R       | D       | I   | L |
| <i>Nitrobacter hamburgensis</i>  | 810 | APLA   | F   | S  | K   | P       | V     | R       | D       | I   | L |
| <i>Nitrococcus mobilis</i>       | 815 | APSV   | F   | P  | Q   | P       | V     | K       | D       | I   | V |
| <i>Escherichia coli</i>          | 838 | CVGH   | L   | G  | K   | .E      | T     | D       | I       | V   | L |
| <i>Aromatoleum aromaticum</i>    | 702 | AAAR   | G   | L  | T   | E       | ..... |         |         |     |   |

|                                  |     |      |   |   |   |   |   |   |   |   |   |   |
|----------------------------------|-----|------|---|---|---|---|---|---|---|---|---|---|
| <i>Kuenenia stuttgartiensis</i>  |     |      |   |   |   |   |   |   |   |   |   |   |
| <i>Jettenia caeni</i>            |     |      |   |   |   |   |   |   |   |   |   |   |
| <i>Brocadia fulgida</i>          |     |      |   |   |   |   |   |   |   |   |   |   |
| <i>Scalindua brodae</i>          |     |      |   |   |   |   |   |   |   |   |   |   |
| <i>Nitrospira defluvii</i>       |     |      |   |   |   |   |   |   |   |   |   |   |
| <i>Nitrospira nitrificans</i>    |     |      |   |   |   |   |   |   |   |   |   |   |
| <i>Nitrospira inopinata</i>      |     |      |   |   |   |   |   |   |   |   |   |   |
| <i>Nitrospina gracilis</i>       |     |      |   |   |   |   |   |   |   |   |   |   |
| <i>Nitrotoga sp.</i>             |     |      |   |   |   |   |   |   |   |   |   |   |
| <i>Hydrogenobaculum sp.</i>      |     |      |   |   |   |   |   |   |   |   |   |   |
| <i>Beggiatoa sp.</i>             | 863 | VVRD | Y | K | N | L | Y | N | R | F | T | S |
| <i>Thiocapsa sp. KS1</i>         | 895 | VTRD | Y | T | K | I | H | M | Y | T | L | G |
| <i>Nitrolancea hollandica Ib</i> | 855 | VERD | Y | V | N | F | Y | N | R | W | I | S |
| <i>Nitrobacter winogradskyi</i>  | 861 | VERD | Y | A | N | L | Y | N | K | F | I | S |
| <i>Nitrobacter hamburgensis</i>  | 861 | VERD | Y | A | N | L | Y | N | K | F | I | S |
| <i>Nitrococcus mobilis</i>       | 866 | FERD | Y | S | L | I | Y | N | K | Y | I | S |
| <i>Escherichia coli</i>          | 889 | VERD | Y | P | A | T | Y | E | R | F | T | S |
| <i>Aromatoleum aromaticum</i>    | 716 | RKRR | Y | D | E | L | Y | K | K | F | T | M |

|                                  |     |       |   |   |   |   |   |   |   |   |   |   |   |
|----------------------------------|-----|-------|---|---|---|---|---|---|---|---|---|---|---|
| <i>Kuenenia stuttgartiensis</i>  | 772 | RLLDG | S | T | T | M | K | G | Y | T | C | E | D |
| <i>Jettenia caeni</i>            | 771 | RLLDG | S | T | T | T | K | G | Y | S | F | V | I |
| <i>Brocadia fulgida</i>          | 771 | RLLDG | S | T | T | F | K | G | Y | T | F | D | I |
| <i>Scalindua brodae</i>          | 773 | RLFDG | S | V | P | T | R | G | Y | N | V | D | M |
| <i>Nitrospira defluvii</i>       | 773 | RILD  | A | S | T | T | F | F | G | S | A | D | V |
| <i>Nitrospira nitrificans</i>    | 772 | RLLD  | A | S | T | T | F | F | G | S | A | D | V |
| <i>Nitrospira inopinata</i>      | 772 | RMLD  | A | S | T | T | F | F | G | S | A | D | V |
| <i>Nitrospina gracilis</i>       | 774 | RLFT  | T | S | T | A | G | M | C | Y | N | I | D |
| <i>Nitrotoga sp.</i>             | 787 | RVLN  | A | G | S | A | T | R | G | M | V | F | A |
| <i>Hydrogenobaculum sp.</i>      | 771 | RIIN  | A | S | S | N | L | K | G | Y | K | I | E |
| <i>Beggiatoa sp.</i>             | 912 | NGDT  | Y | P | S | L | N | E | V | H | A | I | N |
| <i>Thiocapsa sp. KS1</i>         | 943 | EKQ   | R | P | N | M | E | T | A | A | K | V | E |
| <i>Nitrolancea hollandica Ib</i> | 914 | GGQ   | R | P | R | L | E | F | A | E | E | A | C |
| <i>Nitrobacter winogradskyi</i>  | 920 | GGK   | R | P | S | L | E | D | V | L | D | A | C |
| <i>Nitrobacter hamburgensis</i>  | 920 | GGK   | R | P | S | L | E | D | V | L | D | A | C |
| <i>Nitrococcus mobilis</i>       | 925 | GGK   | R | P | S | L | E | D | V | L | D | A | C |
| <i>Escherichia coli</i>          | 939 | PAK   | Q | P | M | L | N | T | A | I | D | A | E |
| <i>Aromatoleum aromaticum</i>    | 747 | ..... |   |   |   |   |   |   |   |   |   |   |   |

α27  
β27

|                                  |      |   |          |             |          |             |      |      |      |     |     |      |      |    |     |     |   |   |     |   |   |   |   |
|----------------------------------|------|---|----------|-------------|----------|-------------|------|------|------|-----|-----|------|------|----|-----|-----|---|---|-----|---|---|---|---|
|                                  |      |   |          | $\alpha 30$ |          | $\alpha 31$ |      |      |      |     |     |      |      |    |     |     |   |   |     |   |   |   |   |
|                                  |      |   | ●●●●●●●● | ●●●●●●●●    | ●●●●●●●● | ●●●●●●●●    |      |      |      |     |     |      |      |    |     |     |   |   |     |   |   |   |   |
| <i>Kuenenia stuttgartiensis</i>  | 800  | M | ..LLFR   | TYPRHFF     | W        | ..E         | QVHE | ..S  | IPFY | TP  | TGR | LQAY | ND   | EP | E   | I   | E | I | E   | I | E | I | E |
| <i>Jettenia caeni</i>            | 799  | L | ..LLYR   | TYPRHFF     | W        | ..E         | QVHE | ..S  | IPFY | TP  | TGR | LQAY | ND   | EP | E   | I   | E | I | E   | I | E | I | E |
| <i>Brocadia fulgida</i>          | 799  | L | ..LLYR   | TYPRHFF     | W        | ..E         | QVHE | ..S  | IPFY | TP  | TGR | LQAY | ND   | EP | E   | I   | E | I | E   | I | E | I | E |
| <i>Scalindua brodae</i>          | 801  | L | ..LNF    | GTYPR       | TPMY     | ..E         | QVVY | ..D  | RF   | FH  | TD  | DGR  | LHSY | CD | I   | P   | E | A | I   | E | I | E | I |
| <i>Nitrospira defluvii</i>       | 797  | M | ..VMCR   | TYPRHPL     | W        | ..E         | ETNE | ..S  | K    | P   | H   | WT   | RS   | GR | LE  | T   | R | I | E   | P | E | A | I |
| <i>Nitrospira nitrificans</i>    | 796  | M | ..VMVR   | TYPRHPL     | W        | ..E         | ETNE | ..S  | K    | P   | M   | WT   | RS   | GR | LE  | T   | R | I | E   | P | E | A | I |
| <i>Nitrospira inopinata</i>      | 796  | M | ..VMVR   | TYPRHPL     | W        | ..E         | ETNE | ..S  | K    | P   | M   | WT   | RS   | GR | LE  | T   | R | I | E   | P | E | A | I |
| <i>Nitrospina gracilis</i>       | 802  | L | ..LLYR   | TYPRHPL     | W        | ..E         | MYTE | ..S  | K    | P   | F   | Y    | T    | P  | N   | G   | R | I | Q   | F | N | D | E |
| <i>Nitrotoga sp.</i>             | 814  | I | ..FMAR   | TYP         | RVSG     | W           | ..E  | QTAE | GG   | G   | I   | P    | W    | Y  | T   | K   | S | G | R   | O | E | Y | M |
| <i>Hydrogenobaculum sp.</i>      | 798  | L | ..VMTR   | FY          | K        | F           | I    | G    | Y    | ..D | Q   | T    | V    | D  | ..G | K   | P | W | Y   | T | K | S | G |
| <i>Beggiatoa sp.</i>             | 971  | E | D        | I           | Q        | R           | O    | P    | R    | R   | L   | L    | T    | S  | P   | C   | W | S | G   | L | M | N | E |
| <i>Thiocapsa sp. KS1</i>         | 1002 | P | D        | L           | I        | S           | O    | P    | R    | R   | L   | L    | T    | S  | P   | C   | W | S | A   | I | E | T | K |
| <i>Nitrolancea hollandica Ib</i> | 973  | F | D        | L           | T        | R           | O    | V    | R    | R   | L   | L    | T    | S  | P   | C   | W | T | G   | M | V | N | D |
| <i>Nitrobacter winogradskyi</i>  | 979  | Y | D        | L           | T        | R           | O    | P    | R    | R   | L   | L    | T    | S  | P   | C   | W | T | G   | L | V | N | D |
| <i>Nitrobacter hamburgensis</i>  | 979  | Y | D        | L           | T        | R           | O    | P    | R    | R   | L   | L    | T    | S  | P   | C   | W | T | G   | M | V | N | D |
| <i>Nitrococcus mobilis</i>       | 984  | Y | D        | L           | T        | R           | O    | P    | R    | R   | L   | L    | T    | S  | P   | C   | W | T | G   | M | V | N | D |
| <i>Escherichia coli</i>          | 998  | R | D        | I           | Q        | A           | O    | P    | R    | R   | L   | L    | T    | S  | P   | C   | W | T | G   | M | V | N | D |
| <i>Aromatoleum aromaticum</i>    | 781  | A | ..HANE   | V           | D        | V           | T    | K    | E    | T   | Y   | ..P  | M    | R  | W   | ..F | D | D | ..K | K | V | F | P |

|                                  |      |   |   |            |   |            |   |             |            |
|----------------------------------|------|---|---|------------|---|------------|---|-------------|------------|
|                                  |      |   |   | $\beta 28$ |   | $\beta 29$ |   | $\alpha 32$ | $\beta 30$ |
|                                  |      |   | ● | →          | → | →          | → | ●●●●●●●●    | →          |
| <i>Kuenenia stuttgartiensis</i>  | 841  | G | E | N          | F | I          | V | H           | R          |
| <i>Jettenia caeni</i>            | 840  | G | E | N          | F | I          | V | H           | R          |
| <i>Brocadia fulgida</i>          | 840  | G | E | N          | F | I          | V | H           | R          |
| <i>Scalindua brodae</i>          | 842  | G | E | N          | F | V          | C | H           | R          |
| <i>Nitrospira defluvii</i>       | 838  | G | E | N          | F | I          | S | H           | R          |
| <i>Nitrospira nitrificans</i>    | 837  | G | E | N          | F | I          | S | H           | R          |
| <i>Nitrospira inopinata</i>      | 837  | G | E | N          | F | I          | S | H           | R          |
| <i>Nitrospina gracilis</i>       | 843  | G | E | N          | F | I          | V | H           | R          |
| <i>Nitrotoga sp.</i>             | 857  | G | E | N          | L | T          | V | Y           | R          |
| <i>Hydrogenobaculum sp.</i>      | 839  | G | E | N          | L | I          | V | H           | R          |
| <i>Beggiatoa sp.</i>             | 1029 | G | E | H          | L | P          | T | Y           | K          |
| <i>Thiocapsa sp. KS1</i>         | 1060 | G | E | D          | F | P          | V | Y           | K          |
| <i>Nitrolancea hollandica Ib</i> | 1031 | G | E | O          | L | M          | T | H           | K          |
| <i>Nitrobacter winogradskyi</i>  | 1037 | G | E | H          | I | P          | T | Y           | K          |
| <i>Nitrobacter hamburgensis</i>  | 1037 | G | E | H          | I | P          | T | Y           | K          |
| <i>Nitrococcus mobilis</i>       | 1042 | G | A | O          | L | C          | T | Y           | R          |
| <i>Escherichia coli</i>          | 1056 | G | E | S          | L | L          | V | Y           | R          |
| <i>Aromatoleum aromaticum</i>    | 825  | G | E | S          | L | P          | T | H           | K          |

|                                  |      |    |          |             |    |             |    |            |          |             |
|----------------------------------|------|----|----------|-------------|----|-------------|----|------------|----------|-------------|
|                                  |      |    |          | $\alpha 33$ |    | $\alpha 34$ |    | $\beta 31$ |          | $\alpha 35$ |
|                                  |      |    | ●●●●●●●● | ●●●●●●●●    | →  | →           | →  | →          | ●●●●●●●● |             |
| <i>Kuenenia stuttgartiensis</i>  | 893  | S  | W        | E           | T  | K           | K  | T          | K        |             |
| <i>Jettenia caeni</i>            | 892  | S  | W        | A           | E  | T           | K  | K          | T        |             |
| <i>Brocadia fulgida</i>          | 892  | S  | W        | S           | D  | T           | K  | Q          | T        |             |
| <i>Scalindua brodae</i>          | 894  | P  | W        | S           | E  | V           | K  | K          | T        |             |
| <i>Nitrospira defluvii</i>       | 890  | P  | W        | S           | E  | V           | K  | K          | T        |             |
| <i>Nitrospira nitrificans</i>    | 889  | A  | W        | Q           | E  | I           | K  | R          | H        |             |
| <i>Nitrospira inopinata</i>      | 889  | S  | W        | D           | E  | I           | K  | R          | H        |             |
| <i>Nitrospina gracilis</i>       | 895  | P  | W        | S           | S  | V           | R  | T          | T        |             |
| <i>Nitrotoga sp.</i>             | 916  | T  | T        | K           | E  | L           | M  | A          | T        |             |
| <i>Hydrogenobaculum sp.</i>      | 898  | S  | P        | A           | K  | L           | K  | D          | T        |             |
| <i>Beggiatoa sp.</i>             | 1051 | .. | ..       | ..          | .. | ..          | .. | ..         | ..       |             |
| <i>Thiocapsa sp. KS1</i>         | 1082 | .. | ..       | ..          | .. | ..          | .. | ..         | ..       |             |
| <i>Nitrolancea hollandica Ib</i> | 1053 | .. | ..       | ..          | .. | ..          | .. | ..         | ..       |             |
| <i>Nitrobacter winogradskyi</i>  | 1059 | .. | ..       | ..          | .. | ..          | .. | ..         | ..       |             |
| <i>Nitrobacter hamburgensis</i>  | 1059 | .. | ..       | ..          | .. | ..          | .. | ..         | ..       |             |
| <i>Nitrococcus mobilis</i>       | 1064 | .. | ..       | ..          | .. | ..          | .. | ..         | ..       |             |
| <i>Escherichia coli</i>          | 1078 | .. | ..       | ..          | .. | ..          | .. | ..         | ..       |             |
| <i>Aromatoleum aromaticum</i>    | 838  | .. | ..       | ..          | .. | ..          | .. | ..         | ..       |             |

|                                  |      |   |   |            |   |             |   |            |   |            |
|----------------------------------|------|---|---|------------|---|-------------|---|------------|---|------------|
|                                  |      |   |   | $\beta 32$ |   | $\alpha 36$ |   | $\beta 33$ |   | $\beta 34$ |
|                                  |      |   | → | →          | → | →           | → | →          | → |            |
| <i>Kuenenia stuttgartiensis</i>  | 952  | V | G | E          | H | Q           | I | H          | I |            |
| <i>Jettenia caeni</i>            | 951  | V | G | E          | H | Q           | I | H          | I |            |
| <i>Brocadia fulgida</i>          | 951  | V | G | E          | H | Q           | I | H          | I |            |
| <i>Scalindua brodae</i>          | 953  | A | G | E          | H | Q           | L | H          | I |            |
| <i>Nitrospira defluvii</i>       | 949  | V | G | E          | H | Q           | I | H          | I |            |
| <i>Nitrospira nitrificans</i>    | 948  | V | G | E          | H | Q           | I | H          | I |            |
| <i>Nitrospira inopinata</i>      | 948  | V | G | E          | H | Q           | I | H          | I |            |
| <i>Nitrospina gracilis</i>       | 954  | V | G | E          | H | Q           | I | H          | I |            |
| <i>Nitrotoga sp.</i>             | 975  | V | G | E          | G | F           | V | D          | V |            |
| <i>Hydrogenobaculum sp.</i>      | 958  | V | V | D          | A | F           | I | E          | I |            |
| <i>Beggiatoa sp.</i>             | 1086 | R | G | I          | E | P           | F | W          | I |            |
| <i>Thiocapsa sp. KS1</i>         | 1117 | R | G | G          | P | T           | V | W          | I |            |
| <i>Nitrolancea hollandica Ib</i> | 1087 | R | G | I          | E | P           | C | W          | L |            |
| <i>Nitrobacter winogradskyi</i>  | 1093 | R | G | M          | D | P           | V | W          | I |            |
| <i>Nitrobacter hamburgensis</i>  | 1093 | R | G | M          | D | P           | V | W          | I |            |
| <i>Nitrococcus mobilis</i>       | 1098 | R | G | M          | D | P           | V | W          | I |            |
| <i>Escherichia coli</i>          | 1113 | R | G | G          | P | V           | V | W          | L |            |
| <i>Aromatoleum aromaticum</i>    | 869  | R | G | Q          | P | V           | V | H          | M |            |

|                                  |      | β35      |    | α37                |                      |
|----------------------------------|------|----------|----|--------------------|----------------------|
| <i>Kuenenia_stuttgartiensis</i>  |      | →        |    | ○○○○○○○○○○         |                      |
| <i>Kuenenia_stuttgartiensis</i>  | 1012 | PYNCTMMK | HS | SAWIS              | SDKTVQAHETRPDGRALS   |
| <i>Jettenia_caeni</i>            | 1011 | PYGVTMMK | HS | SAWIS              | STERSVKAHETRPDGRALS  |
| <i>Brocadia_fulgida</i>          | 1011 | PYGVTMMK | HS | SAWIS              | STERSVKAHESRPDGRALS  |
| <i>Scalindua_brodae</i>          | 1013 | PYHTTMMK | H  | STNVATEKSVKAHENR   | KDGMAMSK.DGYLSNFRY   |
| <i>Nitrospira_defluvii</i>       | 1009 | PYHVTMAK | H  | HAPYVSTAKSVKGHETRP | PDGRAIAVDVTGYQSNFRY  |
| <i>Nitrospira_nitrificans</i>    | 1008 | PYHVTMAK | H  | HAPYVSTAKSVKGHETRP | PDGRAIAIDTGYQSNFRY   |
| <i>Nitrospira_inopinata</i>      | 1008 | PYHVTMAK | H  | HAPFVATPKSVKGHETRP | PDGRAIAIDTGYQSNFRY   |
| <i>Nitrospina_gracilis</i>       | 1014 | PYHTAMMK | H  | SCWTS              | STERSVKAHEERPDGRALS  |
| <i>Nitrotoga_sp.</i>             | 1035 | SQGSRMRY | Y  | NAYAA              | TYGSMEGARTRADGLAKS   |
| <i>Hydrogenobaculum_sp.</i>      | 1018 | PPGLAKI  | W  | FNMYGSSHG          | SVKGTKVNKNGLAENP     |
| <i>Beggiatoa_sp.</i>             | 1129 | PQGVCIWY | H  | SPERTI             | .SIPKSPLRG.....GRRAG |
| <i>Thiocapsa_sp._KS1</i>         | 1160 | PRDMSIVY | H  | QTERIV             | .NVPPFSSLAR.....ER   |
| <i>Nitrolancea_hollandica_Ib</i> | 1130 | QMGTCMIY | H  | APERIT             | .SIPKSOVRG.....NRRG  |
| <i>Nitrobacter_winogradskyi</i>  | 1136 | QPGTCMY  | H  | AVERTV             | .YIPKSQERK.....WRGG  |
| <i>Nitrobacter_hamburgensis</i>  | 1136 | QPGTCMY  | H  | AVERTV             | .YIPKSQERK.....WRGG  |
| <i>Nitrococcus_mobilis</i>       | 1141 | QSGMCLY  | H  | AVERTI             | .YIPKQIRG.....GRRAG  |
| <i>Escherichia_coli</i>          | 1156 | PAGMTMMY | H  | AQERIV             | .NLPGSEITQ.....QRGG  |
| <i>Aromatoleum_aromaticum</i>    | 912  | QPKQCLVY | H  | WDAHQY             | ..L.....KGG.....WK.. |

|                                  |      | β36      |       | β37     |    | β38         |   | α38         |
|----------------------------------|------|----------|-------|---------|----|-------------|---|-------------|
| <i>Kuenenia_stuttgartiensis</i>  |      | →        |       | →       |    | →           |   | ○○○○○○      |
| <i>Kuenenia_stuttgartiensis</i>  | 1071 | DSLFLHKA | K     | IGMKFI  | GF | EADNHCINTV  | P | KETLVKTKAE  |
| <i>Jettenia_caeni</i>            | 1071 | DSLFLHKA | K     | IGMKFVF | GF | EADNHGINTV  | P | KETLVKTKAE  |
| <i>Brocadia_fulgida</i>          | 1071 | DSLFLHKS | K     | TSMKFI  | GF | EADNHGINTT  | P | KETLVKTKAE  |
| <i>Scalindua_brodae</i>          | 1072 | DTLFLHKK | V     | FMGFMH  | GG | EADNHVVNTV  | P | KETLVRI     |
| <i>Nitrospira_defluvii</i>       | 1069 | DSLPLGK  | Q     | ANALKFK | WG | EIDHHAVNTV  | P | KECLIRI     |
| <i>Nitrospira_nitrificans</i>    | 1068 | DSLPLGK  | S     | ANGLKFK | WG | EIDHHAVNTV  | P | KECLIRI     |
| <i>Nitrospira_inopinata</i>      | 1068 | DSLPLGK  | H     | AIAWKFK | WG | YQVDHHAINTV | P | KECLIRI     |
| <i>Nitrospina_gracilis</i>       | 1074 | DSLFLHKA | K     | SKMKFM  | GF | EADNHAINTA  | P | KETLVKFS    |
| <i>Nitrotoga_sp.</i>             | 1095 | DTLANKK  | V     | FQEI    | I  | GHQNDVHCAN  | G | AP          |
| <i>Hydrogenobaculum_sp.</i>      | 1078 | DTLVRK   | D     | LFGQTL  | N  | KGFMLDVCPT  | G | AP          |
| <i>Beggiatoa_sp.</i>             | 1174 | GGYGO    | ..... |         |    | FTHLN       | Y | WGPTGVN     |
| <i>Thiocapsa_sp._KS1</i>         | 1210 | GGYAO    | ..... |         |    | WTYMLN      | Y | OGTSPSE     |
| <i>Nitrolancea_hollandica_Ib</i> | 1175 | GGYAO    | ..... |         |    | WTYMLN      | Y | WGPTGVN     |
| <i>Nitrobacter_winogradskyi</i>  | 1180 | GGYAO    | ..... |         |    | FTYGNW      | Y | WGPTG       |
| <i>Nitrobacter_hamburgensis</i>  | 1180 | GGYAO    | ..... |         |    | FTYGNW      | Y | WGPTG       |
| <i>Nitrococcus_mobilis</i>       | 1186 | GGSGQ    | ..... |         |    | FTYAWN      | Y | WGPTG       |
| <i>Escherichia_coli</i>          | 1200 | GGYAH    | ..... |         |    | LAYGFN      | Y | YGTVGSN     |
| <i>Aromatoleum_aromaticum</i>    | 947  | GGYEQ    | ..... |         |    | ERY         | Y | FMNGSPAPVTD |

|                                  |      | α39      |       | β39          |
|----------------------------------|------|----------|-------|--------------|
| <i>Kuenenia_stuttgartiensis</i>  |      | ○○○○○○○○ |       | →            |
| <i>Kuenenia_stuttgartiensis</i>  | 1130 | NE..NDFM | KKFL  | NGELIKVDA.   |
| <i>Jettenia_caeni</i>            | 1130 | NE..NDFM | KKYLS | GELIKVEKA    |
| <i>Brocadia_fulgida</i>          | 1130 | NE..NDFM | KRYL  | NGELIKIEKA   |
| <i>Scalindua_brodae</i>          | 1131 | NE..SKFM | KKLYL | QGGTTSVE..   |
| <i>Nitrospira_defluvii</i>       | 1128 | QE..NEFM | VKWL  | KGEHIKIKV.   |
| <i>Nitrospira_nitrificans</i>    | 1127 | QE..NEFM | IKWL  | KGEHIKIKV.   |
| <i>Nitrospira_inopinata</i>      | 1127 | QE..NEFM | IKWL  | KGEHIKIKV.   |
| <i>Nitrospina_gracilis</i>       | 1133 | SPLKDR   | FAEM  | YLAGQY.....  |
| <i>Nitrotoga_sp.</i>             | 1153 | YE..SLQM | RTYL  | KGAFVSR... . |
| <i>Hydrogenobaculum_sp.</i>      | 1137 | NP..NKYF | KKYLE | AGYVIFV.. .  |
| <i>Beggiatoa_sp.</i>             |      |          |       |              |
| <i>Thiocapsa_sp._KS1</i>         | 1258 | A.....   |       |              |
| <i>Nitrolancea_hollandica_Ib</i> |      |          |       |              |
| <i>Nitrobacter_winogradskyi</i>  |      |          |       |              |
| <i>Nitrobacter_hamburgensis</i>  |      |          |       |              |
| <i>Nitrococcus_mobilis</i>       |      |          |       |              |
| <i>Escherichia_coli</i>          | 1244 | ESVK     |       |              |
| <i>Aromatoleum_aromaticum</i>    |      |          |       |              |
