# Supplementary material for: Structural and functional characterization of the intracellular filament-forming nitrite oxidoreductase multiprotein complex
Source: Nat Microbiol. 2021 Jul 15;6(9):1129–39. doi: 10.1038/s41564-021-00934-8 (PMC8387239; doi:10.1038/s41564-021-00934-8)
Supplement: Source Data Fig. 1 — Numerical data for Fig. 1b. [file 41564_2021_934_MOESM5_ESM.xlsx]

## Sheet: Sheet1
Squares		Triangles		Diamonds
t (min)	nitrite (uM)	t (min)	nitrite (uM)	t (min)	nitrite (uM)
0	5.08177	0	4.74094	0	4.31186
2	3.58374	1	3.61733	1	3.68534
6	2.22621	2	3.16104	2	3.16887
8	1.69082	3	2.77194	3	2.70558
10	1.32208	4	2.39273	4	2.35027
12	1.00474	5	2.06051	5	2.08689
14	0.62403	6	1.98302	6	1.84906
16	0.47733
Squares		Triangles		Diamonds
t (min)	nitrate (uM)	t (min)	nitrate (uM)	t (min)	nitrate (uM)
0	1.55206	0	0.792091	0	2.39741
2	2.50861	1	1.54699	1	2.98286
6	3.70455	2	2.1738	2	3.24444
8	4.08192	3	2.62182	3	3.80148
10	4.57967	4	2.84926	4	5.17097
		6	3.40137	5	4.89557
				6	5.86592
